# Supplementary material for: Structure of the essential peptidoglycan amidotransferase MurT/GatD complex from Streptococcus pneumoniae
Source: PubMed Central journal article supplement (PMC6085368; doi:10.1038/s41467-018-05602-w), 2018-08-09
Supplement: 41467_2018_5602_MOESM1_ESM.pdf [file 41467_2018_5602_MOESM1_ESM.pdf]

# Supplementary Figures and Tables

## Structure of the essential peptidoglycan amidotranferase MurT/GatD complex from *Streptococcus pneumoniae*

Cécile Morlot *et al.*

Induced expression  
of MurT/GatD  
0.2  $\mu$ M ComS

SEM

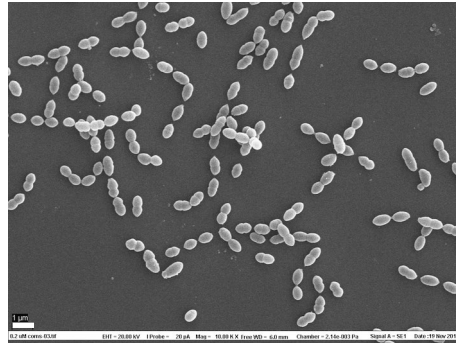

TEM

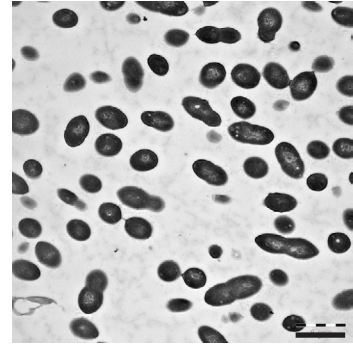

Mild depletion  
of MurT/GatD  
2.5 nM ComS

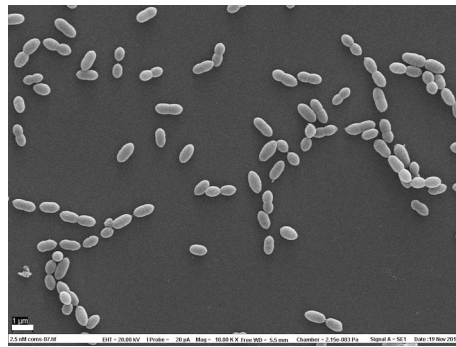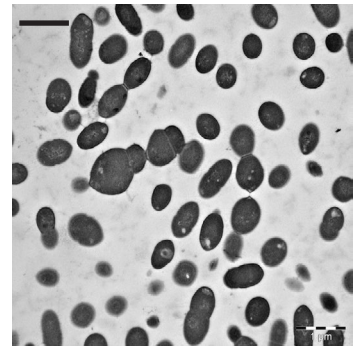

Severe depletion  
of MurT/GatD  
1.5 nM ComS

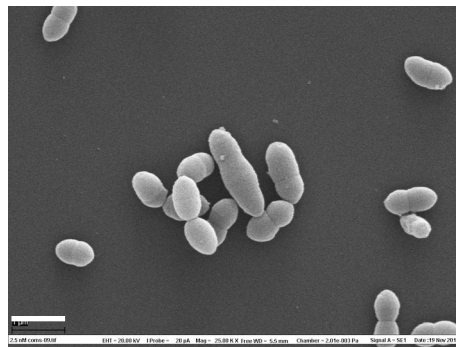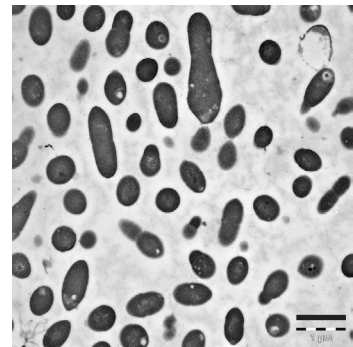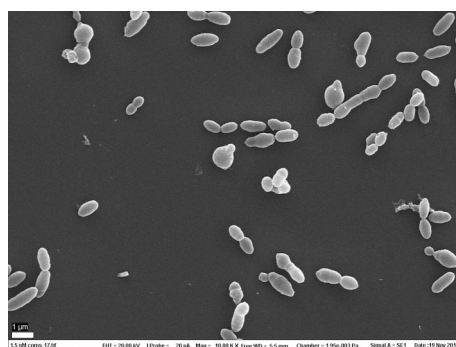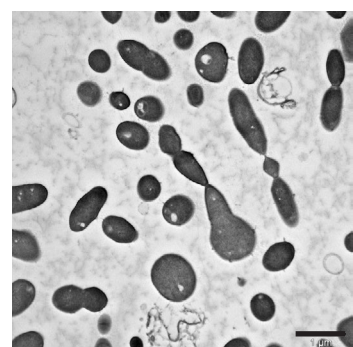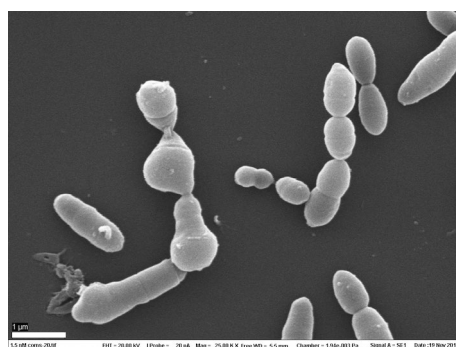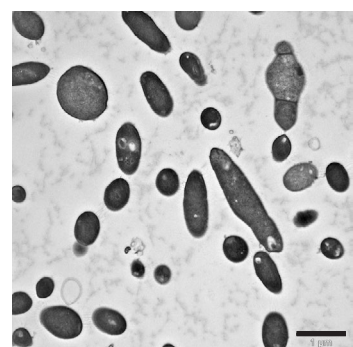

Supplementary Fig. 1

Morphology of *S. pneumoniae* cells depleted of MurT/GatD. In a strain with the endogenous *murT/gatD* operon deleted, expression of MurT/GatD was induced from an ectopic copy of *murT/gatD* under the control of the  $P_{comX}$  promoter in the presence of 0.2  $\mu$ M ComS peptide. Mild and severe depletion of MurT/GatD were obtained in the presence of 2.5 and 1.5 nM ComS. Scanning tunneling (SEM) and thin section transmission (TEM) electron micrographs are shown. Scale bars are 1  $\mu$ m.

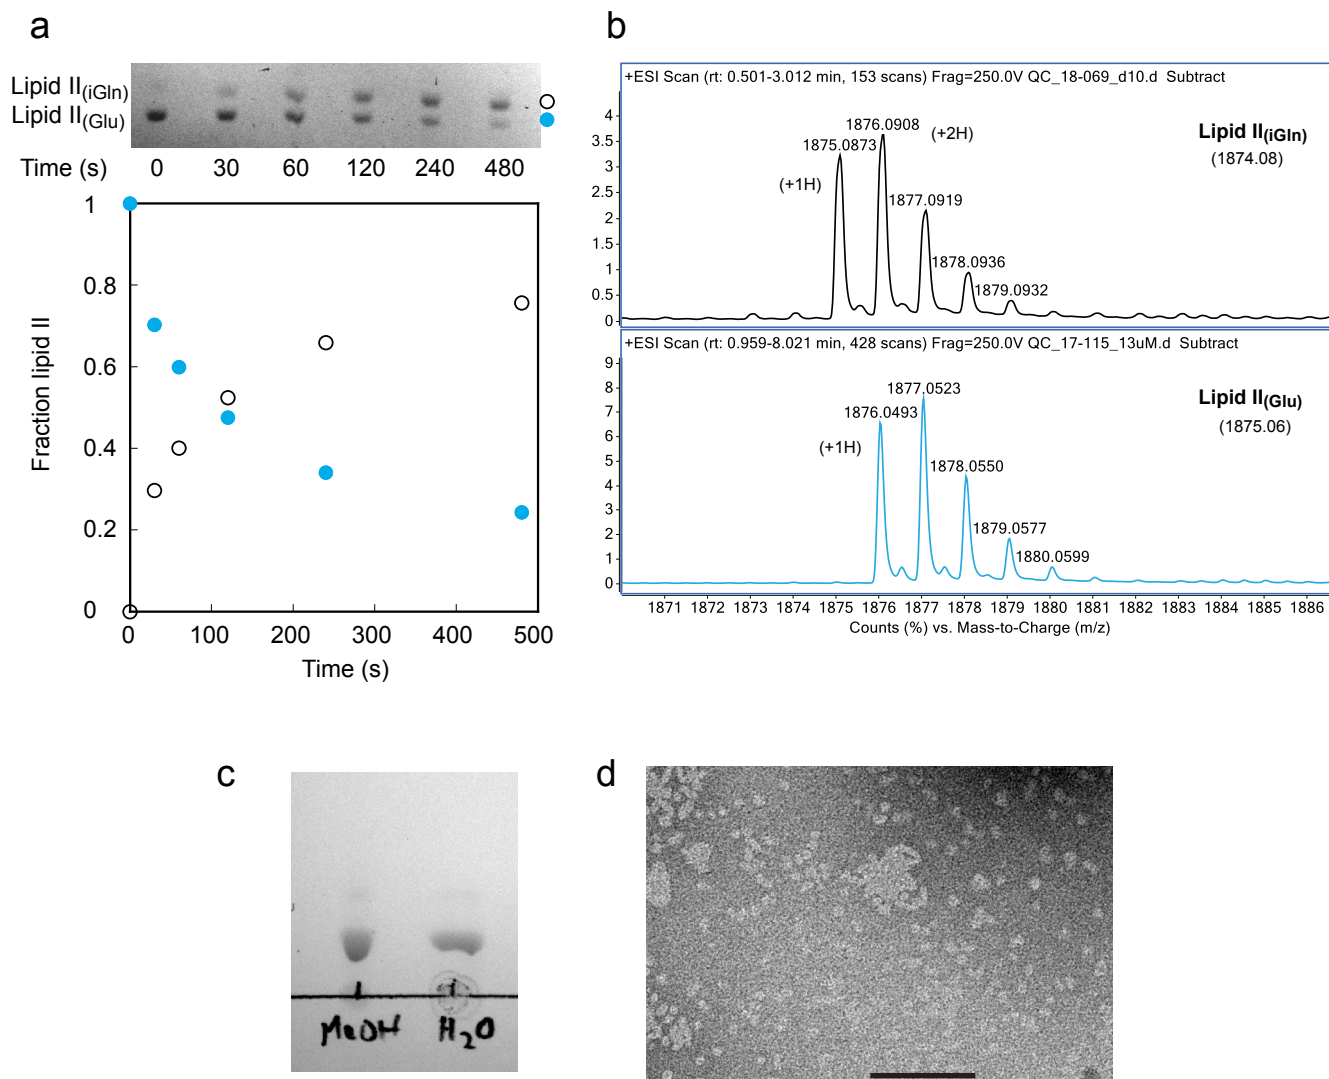

Supplementary Fig. 2

Amidation of lipid II by MurT/GatD and characterisation of lipid II. **(a)** Time course of the reaction catalyzed by MurT/GatD (190 nM) with 20  $\mu$ M lipid II, 2 mM ATP and 10 mM L-Gln, in 50 mM HEPES, pH 7.5, 150 mM NaCl, 10 mM MgCl<sub>2</sub><sup>+</sup>, 2 mM TCEP and 1% DDM, at 30°C. Of a 600  $\mu$ L reaction mix, 100  $\mu$ L aliquots were withdrawn at the indicated time and lipid II was extracted with 200  $\mu$ L of butanol prior to analysis by thin layer chromatography (TLC) developed with a 88:48:10:1 chloroform/methanol/water/ammonia mixture and revealed with iodine vapour. **(b)** Deconvoluted LC/electro-sprayionization time of flight mass spectra of the lipid II species. Samples were diluted in acetonitrile:H<sub>2</sub>O (70:30, v:v) containing 25 mM ammonium acetate (pH 7.1) and infused at a flow rate of 10  $\mu$ L/min on an 6210 LC/ESI-TOF mass spectrometer from Agilent Technologies. **(c)** Demonstration of the water dispersibility of lipid II. One microliter of 1 mM lipid II in methanol was either deposited directly on a TLC plate (MeOH) or dried on a microscopy cover slip prior to dissolution in 4  $\mu$ L water and deposition on the plate (H<sub>2</sub>O). The TLC was performed as above. **(d)** Negatively stained electron micrograph of water-dissolved lipid II showing probable micelles. The scale bar is 100 nm.

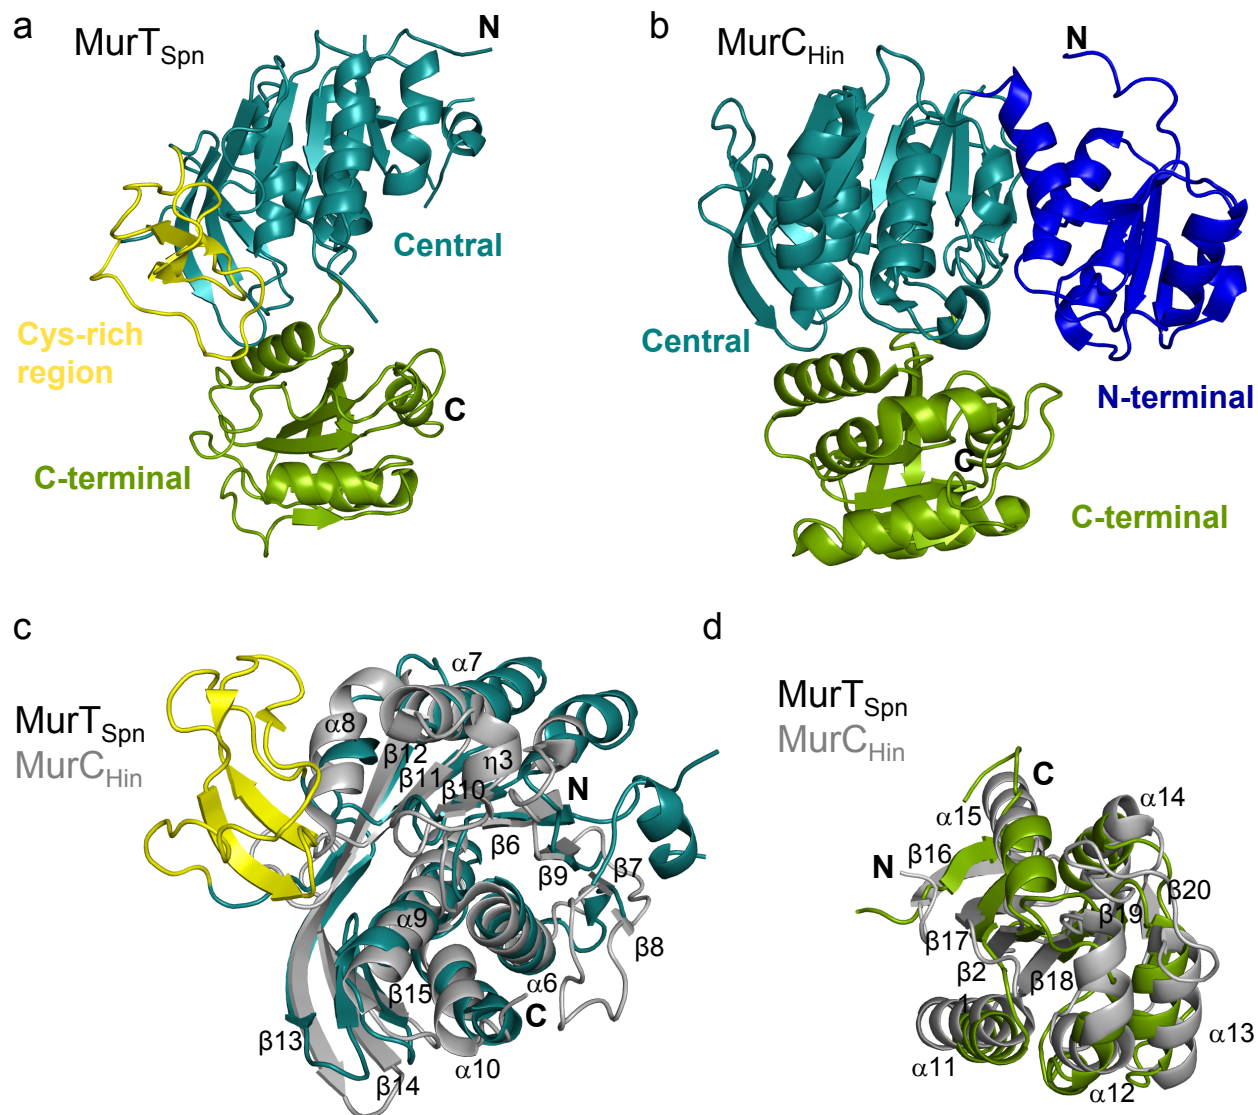

### Supplementary Fig. 3

Ribbon representation of (a) MurT from *S. pneumoniae* (MurT<sub>Spn</sub>) and (b) MurC from *Haemophilus influenzae* (MurC<sub>Hin</sub>, PDB# 1P3D). Domains are indicated and colored in dark blue (N-terminal domain), dark cyan (Central domains), green (C-terminal domains) or yellow (Zinc-ribbon insertion). N- and C-termini are indicated. (c) Superimposition of the central domains of MurT<sub>Spn</sub> (in dark cyan) and MurC<sub>Hin</sub> (in grey). (d) Superimposition of the C-terminal domains of MurT<sub>Spn</sub> (in green) and MurC<sub>Hin</sub> (in grey). N- and C-termini labeling, as well as numbering of  $\alpha$ -helices and  $\beta$ -strands are for MurC<sub>Hin</sub>.



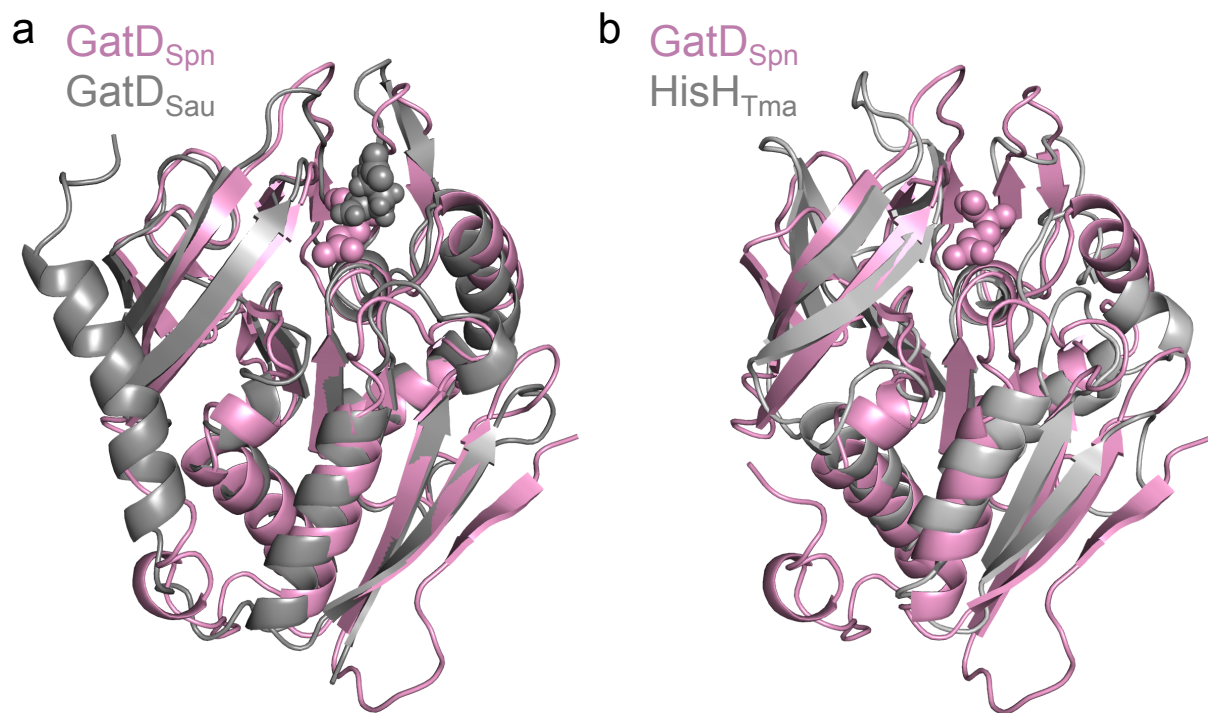

Supplementary Fig. 4

Superimposition of the glutaminases GatD from *S. pneumoniae* (GatD<sub>Spn</sub>, in pink) with **(a)** GatD from *S. aureus* (GatD<sub>Sau</sub>, in grey, PDB# 5N9M) or with **(b)** HisH from *Thermotoga maritima* (HisH<sub>Tma</sub>, in grey, PDB# 1GPW). The glutamine molecules present in the crystal structures are shown as spheres and colored according to the GatD structure they belong to.

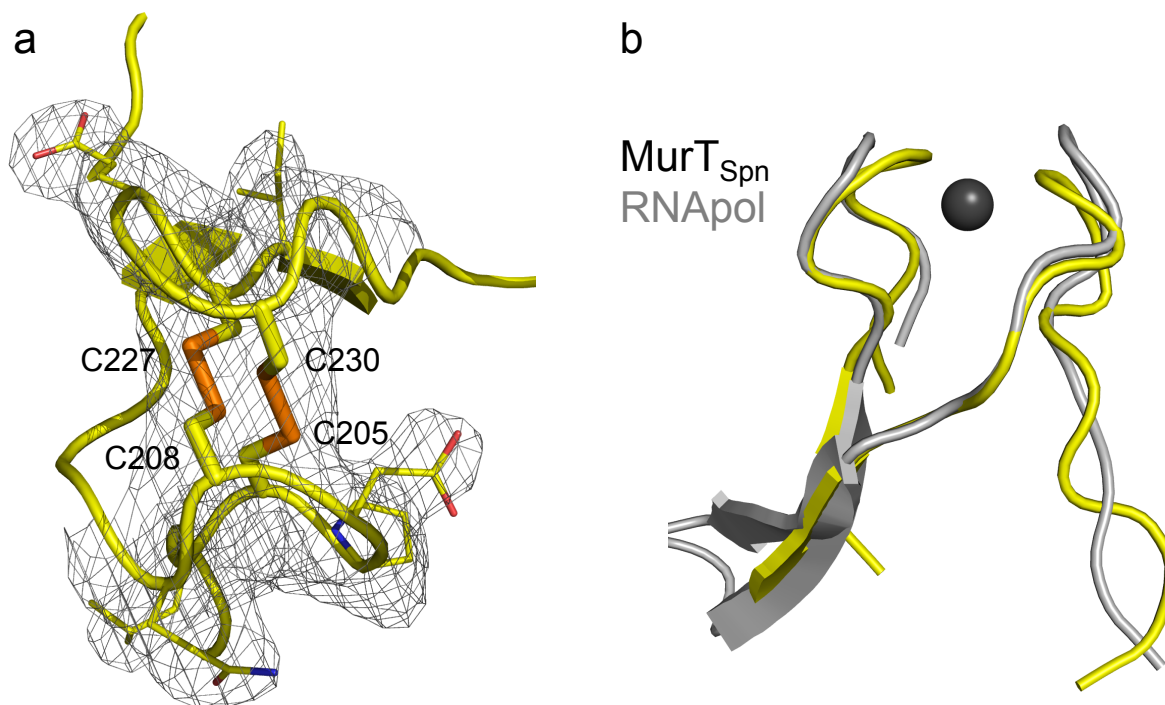

### Supplementary Fig. 5

Cysteine tetrad in the Zinc-ribbon-like insertion. **(a)** Structure of the disulphide bonds <sup>MT</sup>Cys205-Cys230 and <sup>MT</sup>Cys208-Cys227 modeled inside the electron density map. **(b)** Cartoon representation of the superimposition of residues 218-234 and 241-252 of MurT (yellow) and the zinc-ribbon of subunit RBN9 of the yeast RNA polymerase II (PDB# 3QT1 chain I) with bound Zn<sup>2+</sup> (gray and sphere).

### Untreated wild type MurT/GatD

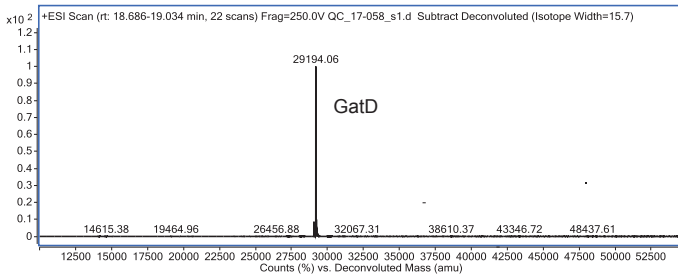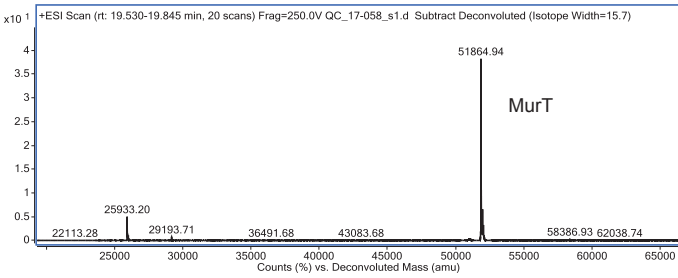

### Iodoacetamide-treated wild type MurT/GatD

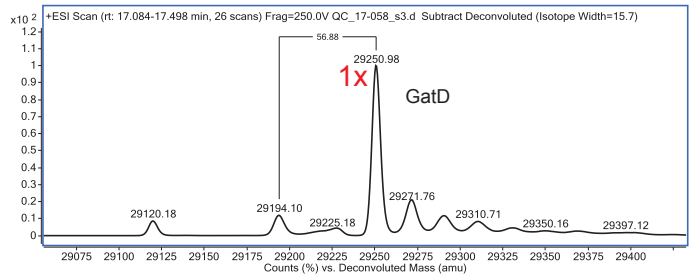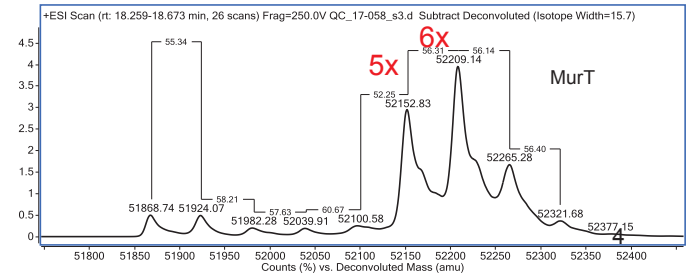

### Untreated 4C4S MurT/GatD

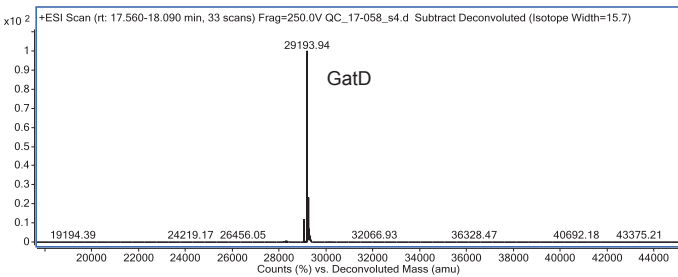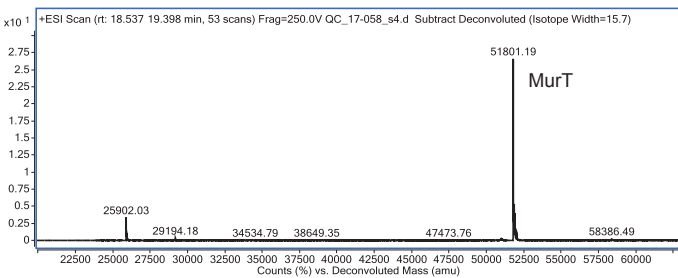

### Iodoacetamide-treated 4C4S MurT/GatD

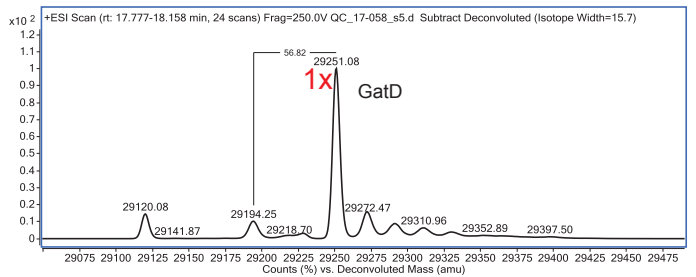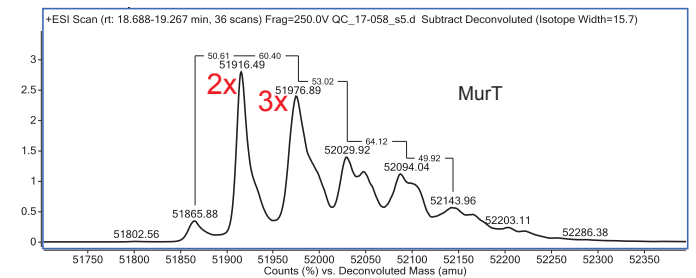

Supplementary Fig. 6

Free accessible thiol counting by alkylation and mass determination. Wild type or the 4C4S variant of MurT/GatD were incubated, after purification, with or without iodoacetamide to alkylate free accessible thiols. The masses were determined by liquid chromatography/electrospray-ionization time of flight mass spectrometry. The numbers of detected alkylation are given in red.

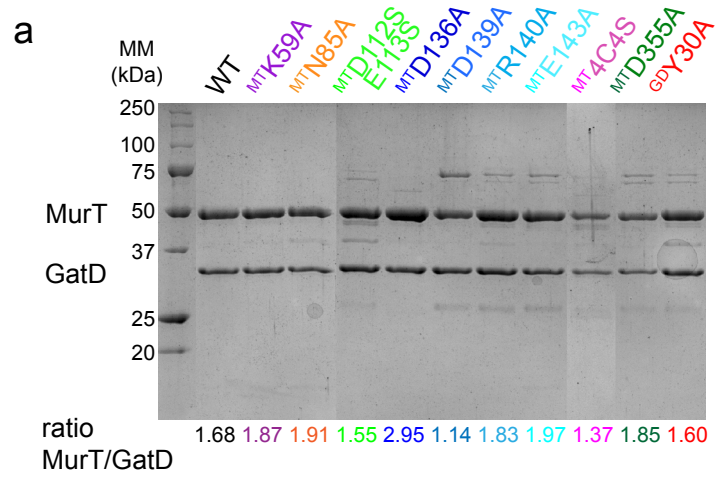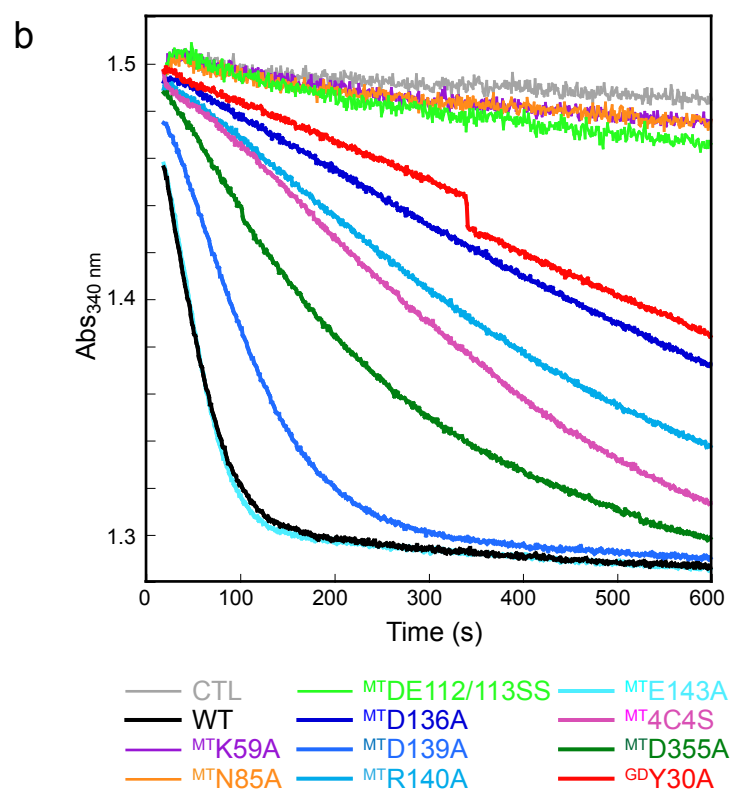

Supplementary Fig. 7

Comparison of the *in vitro* activity of MurT/GatD point mutants. **(a)** Coomassie stained gel of the MurT/GatD variants used in the activity assay. The ratio of the MurT and GatD band intensities is given below the gel. **(b)** The ATPase activity was measured as in Fig. 2 in the presence of 30  $\mu$ M lipid II, 2 mM ATP and 10 mM L-Gln. The protein concentration was 570 nM.



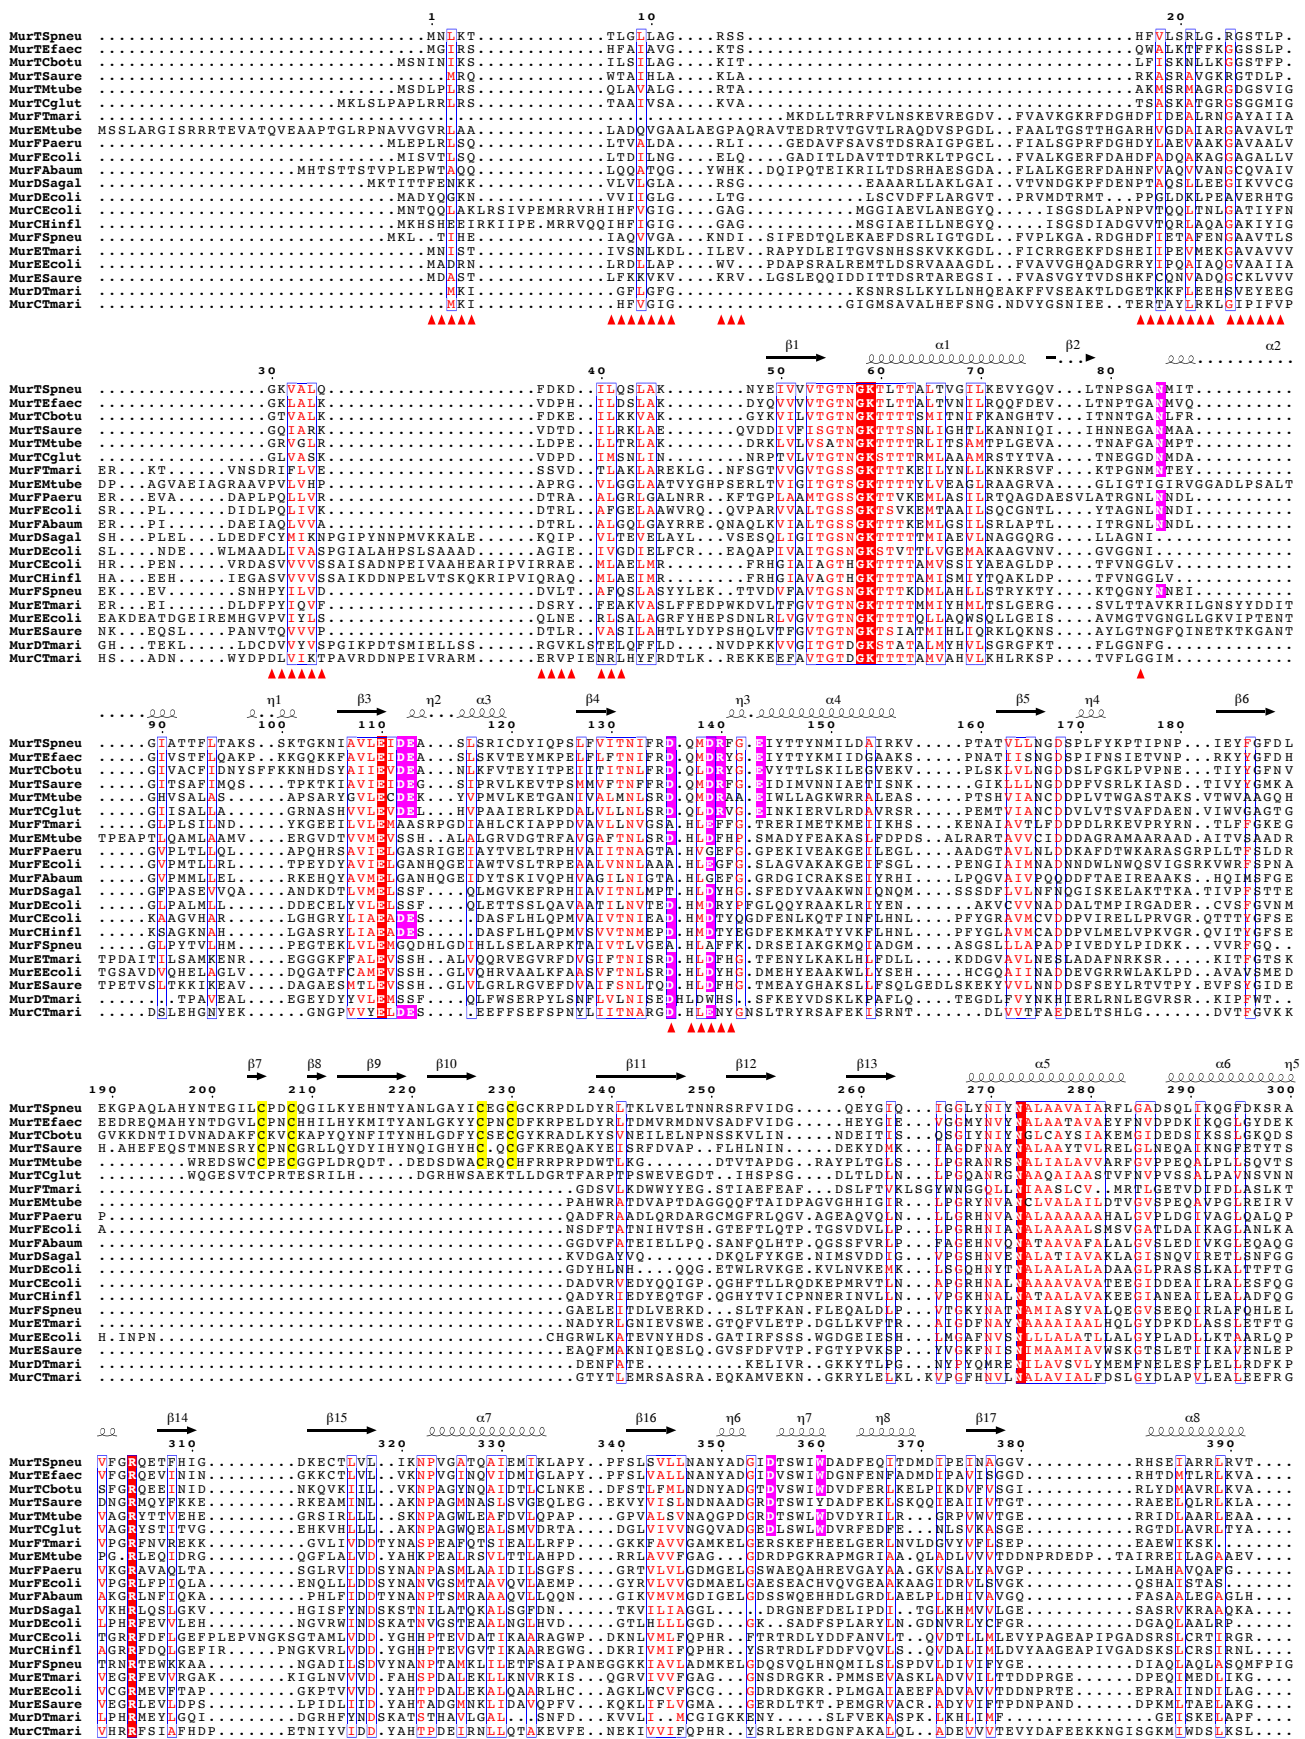

### Supplementary Fig. 8

Sequence alignment of MurT and Mur ligases sequences. Alignments were performed with PROMALS3D<sup>1</sup> using available crystal structures of MurC, D, E and F, as well as of MurT from *S. pneumoniae*. For the latter, the residue numbering and the secondary structure elements are given above the sequences, and the residues that were not resolved in the crystal structure are denoted by red triangle below the sequences.

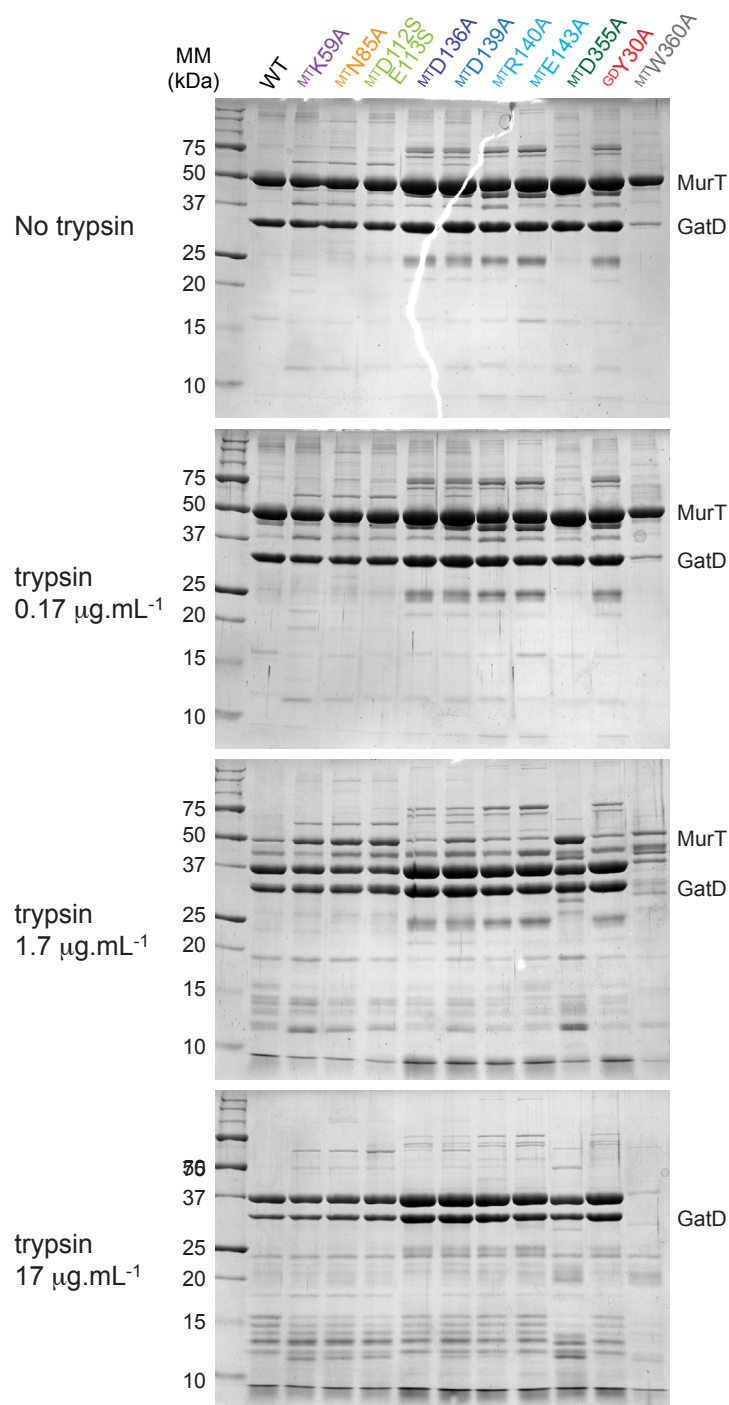

Supplementary Fig. 9

Partial proteolysis by trypsin of MurT/GatD variants. The proteins ( $1.5 \text{ mg.mL}^{-1}$ ) were incubated with the indicated concentration of trypsin in a volume of  $20 \text{ }\mu\text{L}$  for 1 h at  $30^\circ\text{C}$ , prior to stopping of the digestion by the addition of SDS-containing loading buffer supplemented with 1 mM phenylmethyl-sulfonyl fluoride and analysis by Coomassie-stained SDS-PAGE.

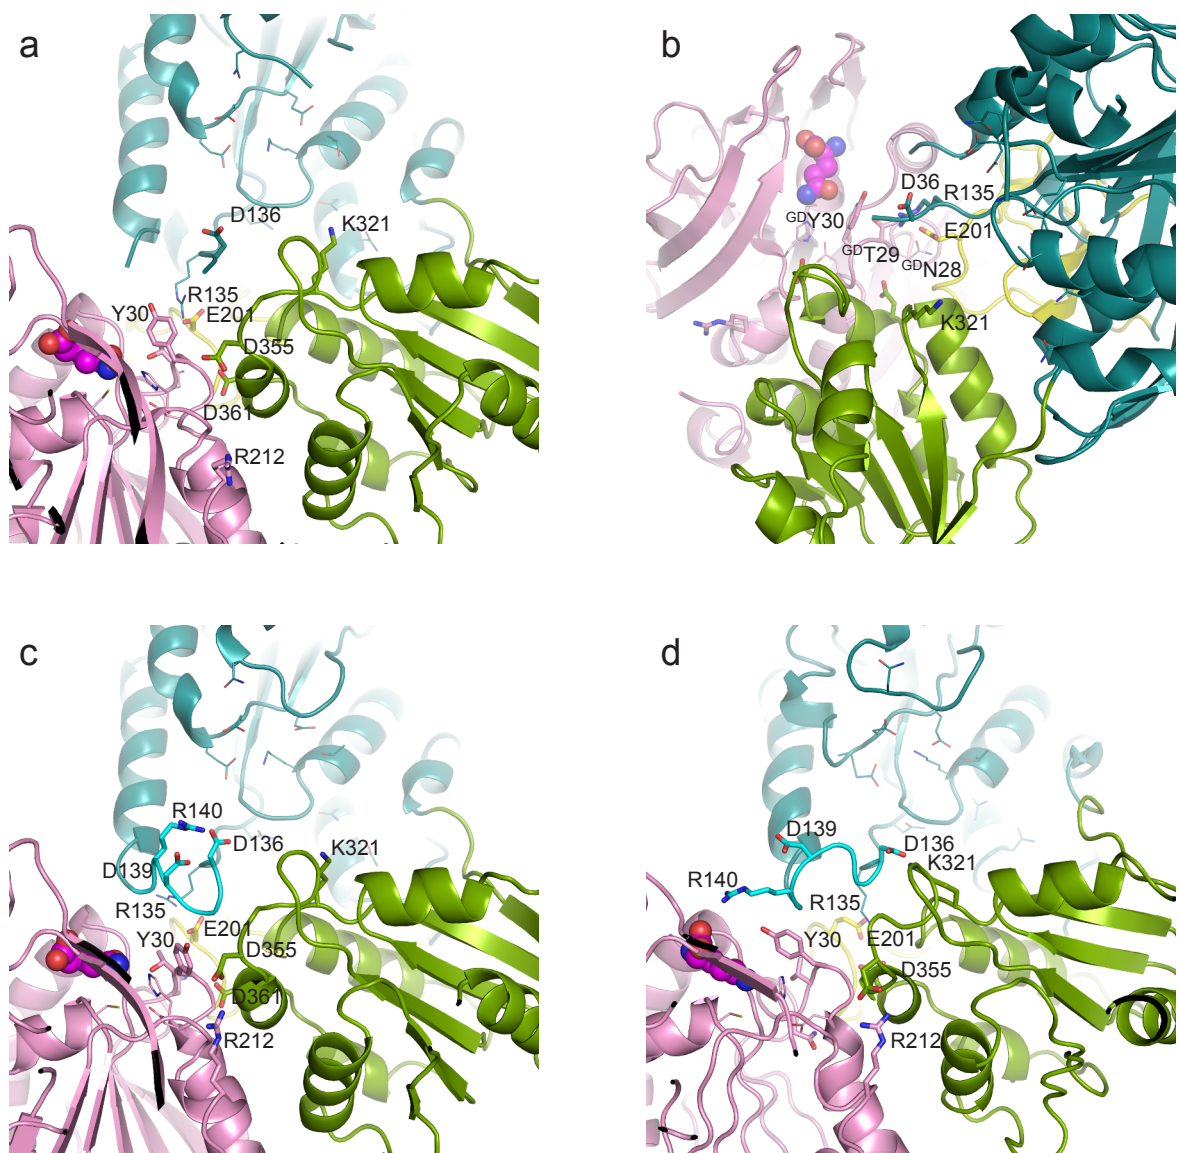

Supplementary Fig. 10

Models of the flexible loop (residues 137-141) in MurT. **(a,b)** Alternative views of the experimental crystal structure of MurT/Gat with residues 137-141 missing. The view in **(b)** shows residues  $^{\text{GD}}\text{Asn28}$ ,  $^{\text{GD}}\text{Thr29}$  and  $^{\text{GD}}\text{Tyr30}$  that block the communication between the active sites of GatD and MurT. **(c,d)** SWISS-MODEL/YASARA and Discovery Studio models, respectively, of MurT/GatD with the same viewing orientation as in **(a)**, showing putative conformations of the 137-141 loop. For the SWISS-MODEL/YASARA model, the deviation from the input crystal structure showed all atoms r.m.s.ds of 1.15 and 0.58 Å for MurT (over 2972 atoms) and GatD (over 1524 atoms) respectively. For the Discovery studio model, the all atoms r.m.s.ds were 2.6 Å for MurT (2972 atoms) and 2.22 Å for GatD (1524 atoms). The entrance of the putative Must tunnel connecting the active sites is open in **(c)** and closed in **(d)**. Domains are colored in dark cyan (MurT central domain), green (MurT C-terminal domains), yellow (MurT Zinc-ribbon-like insertion) and pink (GatD). Residues carried by or surrounding the flexible loop are labeled and shown as atom-colored sticks. The glutamine molecule is shown at atom-colored spheres.

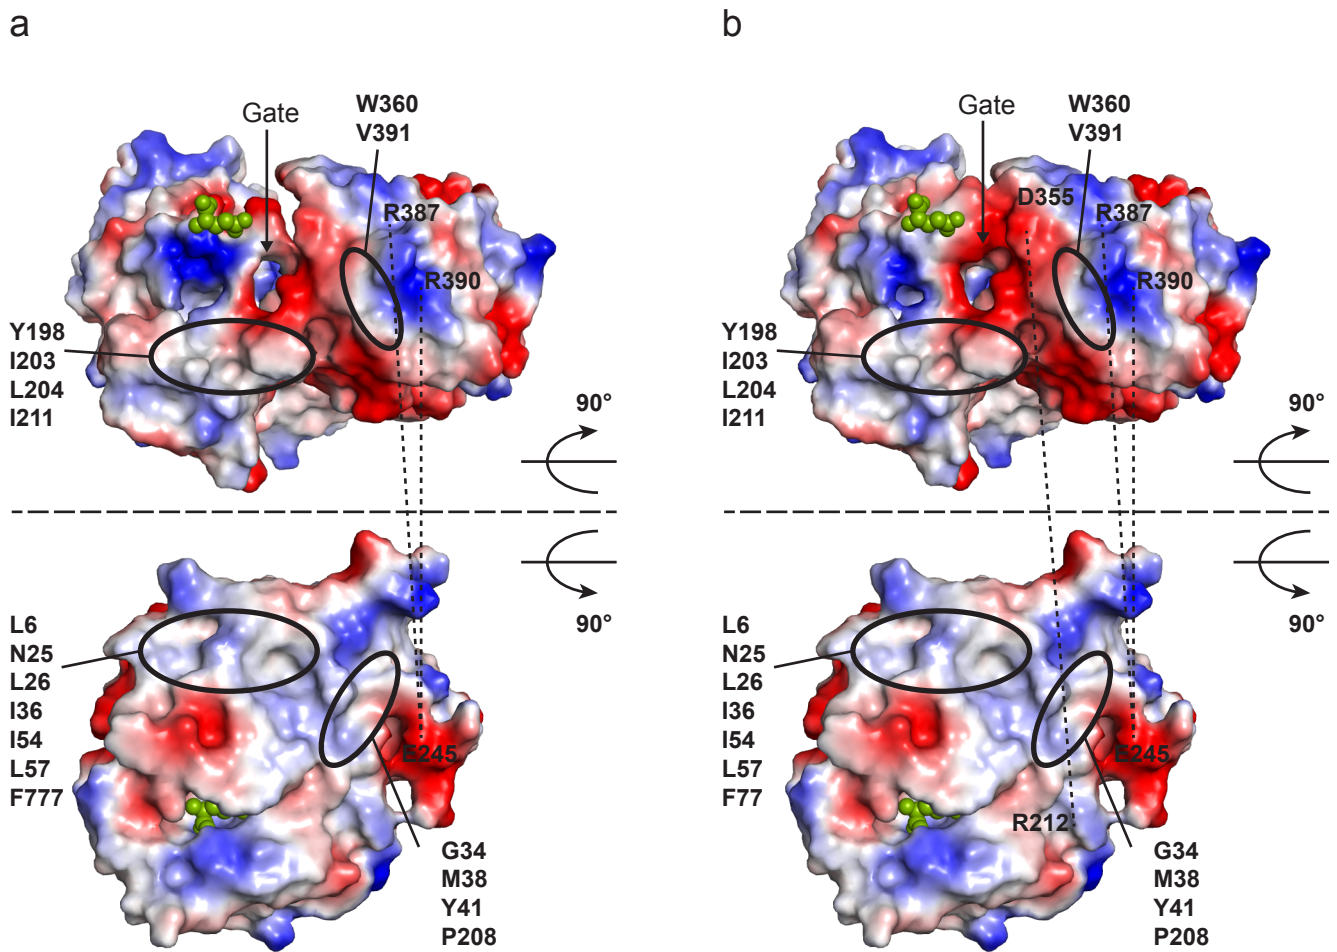

Supplementary Fig. 11

Electrostatic potentials surface of MurT (upper panel) and GatD (lower panel). The two proteins were each rotated by  $90^\circ$  in opposite directions to open the interface plane. The glutamine molecule is shown as green spheres. The hydrophobic interfaces are indicated by black ellipses and the negatively charged entrance of MurT active site is indicated by an arrow. **(a)** Potentials calculated from the experimental crystal structure with residues 137-141 missing. **(b)** Potentials calculated from the SWISSMODEL to include residues 137-141 in a putative conformation.



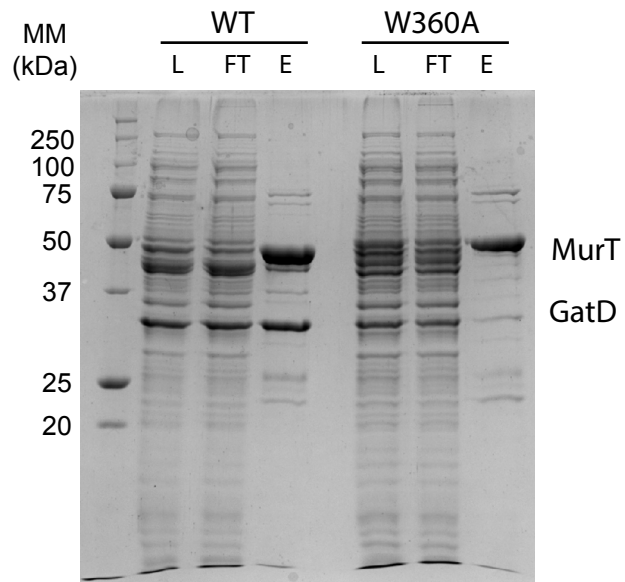

Supplementary Fig. 12

Purification by Ni<sup>2+</sup>-affinity chromatography of His-tagged recombinant MurT expressed in *E. coli* from an operon encoding MurT and GatD (L, loaded cell lysate; FT, flow through; E, elution by imidazole). For wild type (WT) MurT, GatD was co-eluted, whereas for the W360A MurT variant, GatD was not co-purified.

## Supplementary Tables

**Supplementary Table 1** Peptidoglycan composition upon depletion of MurT/GatD

|                                      | MurT/GatD                           | R6                               |               | R6 $\Delta murM$ |               | Retention times (min) |
|--------------------------------------|-------------------------------------|----------------------------------|---------------|------------------|---------------|-----------------------|
|                                      |                                     | expressed                        | depleted      | expressed        | depleted      |                       |
| Mono<br>mers                         | 1 Tri(Glu)                          | 1.19                             | 2.48          | 1.79             | 10.00         | 23.83                 |
|                                      | 2 Tri(Glu,-G) ~70%                  | 8.14                             | 4.63          | 6.72             | 11.88         | 26.05                 |
|                                      | 2 Tri(Glu) ~20%                     | 2.33                             | 1.32          | 1.92             | 3.39          | 26.05                 |
|                                      | 2 Tri(Glu,deAc) ~10%                | 1.16                             | 0.66          | 0.96             | 1.70          | 26.05                 |
|                                      | 3 Tri                               | 22.73                            | 11.43         | 22.09            | 16.83         | 28.75                 |
|                                      | 4 Tri(A) or Tetra                   | 1.63                             | 0.75          | 1.77             | 1.19          | 34.83                 |
|                                      | 5 Penta[deAc]                       | 1.44                             | 0.28          | 0.80             | 0.29          | 36.82                 |
|                                      | 6 Penta[Gly]                        | 0.80                             | 0.16          | 0.97             | 0.82          | 37.7                  |
|                                      | 7 Penta                             | 5.23                             | 2.76          | 3.93             | 1.54          | 40.52                 |
|                                      | 9 Tri-SA (Glu,deAc)                 | 0.43                             | 7.16          | 0.49             | 0.37          | 44.03                 |
|                                      | 10 Tri-AA (Glu) or Penta (Glu)      | 0.81                             | 7.00          | 0.00             | 0.00          | 45.00                 |
|                                      | 11 Tetra(A)                         | 1.01                             | 1.02          | 1.83             | 1.54          | 45.48                 |
|                                      | 12 Tri-AA (Glu) or Penta (Glu) ~50% | 0.90                             | 8.02          | 0.00             | 0.23          | 47.37                 |
|                                      | 12 Tri-SA (Glu) ~50%                | 0.90                             | 8.02          | 0.00             | 0.23          | 47.37                 |
|                                      | 13 Tri(AA)[deAc] Tetra(S)           | 1.02                             | 0.00          | 1.10             | 0.92          | 49.02                 |
|                                      | 14 Tri-AA ~70%                      | 1.17                             | 4.39          | 1.70             | 0.80          | 52.88                 |
|                                      | 14 Penta-SA (Glu) ~30%              | 0.50                             | 1.88          | 0.73             | 0.34          | 52.88                 |
|                                      | 16 Penta(SA), Penta(SA)[-G]         | 1.28                             | 1.81          | 0.00             | 0.00          | 57.75                 |
|                                      | Di<br>mers                          | 16B TetraTri(1 Glu, 1 deAc) ~60% | 0.91          | 0.59             | 1.07          | 4.75                  |
| 16B TetraTri(1Glu) ~40%              |                                     | 0.60                             | 0.40          | 0.71             | 3.17          | 63.57                 |
| 17 TetraTri[deAc] <sup>‡</sup>       |                                     | 6.40                             | 1.04          | 6.23             | 4.92          | 65.42                 |
| 18 TetraTri[deAc] <sup>‡</sup>       |                                     | 9.09                             | 2.09          | 12.60            | 12.78         | 66.2                  |
| 19 TetraTri                          |                                     | 18.97                            | 5.92          | 27.10            | 18.00         | 68.18                 |
| Dimer                                |                                     | 0.59                             | 1.58          | 1.19             | 0.89          | 68.57                 |
| Dimer                                |                                     | 1.50                             | 1.25          | 0.41             | 0.74          | 69.82                 |
| 23 Tetra(SA)Tri                      |                                     | 4.90                             | 4.34          | 0.55             | 0.76          | 72.55                 |
| Dimer                                |                                     | 0.63                             | 0.06          | 0.91             | 0.23          | 74.17                 |
| Dimer                                |                                     | 1.90                             | 5.87          | 1.76             | 0.62          | 76.1                  |
| 29 Tetra-AS-Tri-AS                   |                                     | 1.13                             | 10.74         | 0.00             | 0.19          | 80.35                 |
| 31 Tetra-AS-Tri-AA                   | 0.75                                | 2.36                             | 0.57          | 0.88             | 84.78         |                       |
| <b>Sum of known peaks</b>            |                                     | <b>100.00</b>                    | <b>100.00</b> | <b>100.00</b>    | <b>100.00</b> |                       |
| <b>% Monomers</b>                    |                                     | <b>52.67</b>                     | <b>63.76</b>  | <b>46.80</b>     | <b>52.07</b>  |                       |
| <b>% Dimers</b>                      |                                     | <b>47.33</b>                     | <b>36.24</b>  | <b>53.20</b>     | <b>47.93</b>  |                       |
| <b>% Glu-containing mucopeptides</b> |                                     | <b>17.87</b>                     | <b>42.15</b>  | <b>14.39</b>     | <b>36.06</b>  |                       |
| <b>% branched mucopeptides</b>       |                                     | <b>16.00</b>                     | <b>57.00</b>  |                  |               |                       |

Species were identified by their HPLC retention time<sup>2</sup>. Proportions given as percentage are those of the HPLC peak areas. Glu-containing mucopeptides are on grey background.

## Supplementary Table 2 Data collection and refinement statistics

### Data collection

|                                    |                  |                 |
|------------------------------------|------------------|-----------------|
| Name of dataset                    | 17HATC3          | 11SeHATC4       |
| X-ray source                       | ID30a-1 (ESRF)   | BM30A (ESRF)    |
| Scan range (°)                     | 115              | 360             |
| Oscillation (°)                    | 0.1              | 1.0             |
| Space group                        | R3               | R3              |
| Unit-cell parameters               |                  |                 |
| a, Å                               | 288.39           | 288.81          |
| b, Å                               | 288.39           | 288.81          |
| c, Å                               | 115.09           | 115.10          |
| α, °                               | 90               | 90              |
| β, °                               | 90               | 90              |
| γ, °                               | 120              | 120             |
| Resolution (last shell), Å         | 3.00 (3.12-3.00) | 3.78 (4.0-3.78) |
| Completeness (last shell), %       | 96.2 (96.6)      | 98.2 (89.4)     |
| I/σ(I) (last shell)                | 15.4 (2.6)       | 10.7 (3.8)      |
| Rsym <sup>†</sup> (last shell), %  | 5.8 (47.7)       | 14.7 (48.2)     |
| No of unique reflections           | 68725            | 70428           |
| Wilson B factor, (Å <sup>2</sup> ) | 73               | 69              |

### Refinement and model statistics

|                                             |                  |
|---------------------------------------------|------------------|
| Resolution (last shell), Å                  | 3.00 (3.18-3.00) |
| R-factor <sup>‡</sup> , R-free <sup>§</sup> | 0.203, 0.234     |
| Molecules/asymmetric unit                   | 4                |
| r.m.s.d. from target <sup>i</sup>           |                  |
| Bond lengths, Å                             | 0.014            |
| Bond angle, °                               | 0.737            |
| Average B-factor, Å <sup>2</sup>            | 86               |
| Mean B factor (Å <sup>2</sup> )             | 87               |
| Ramachandran plot <sup>**</sup>             |                  |
| Core, %                                     | 92               |
| Allowed, %                                  | 8                |
| Disallowed, %                               | 1                |

<sup>†</sup>  $R_{sym} = (\sum (ABS(I(h,i) - I(h))) / (\sum I(h,i)))$ .

<sup>‡</sup> R-factor =  $\sum |F_o - F_c| / \sum F_o$  where  $F_o$  and  $F_c$  are the observed and calculated structure factor amplitudes, respectively.

<sup>§</sup> R-free is the R-factor calculated with 5% of the reflections chosen at random and omitted from refinement.

<sup>i</sup> rmsd of bond lengths and bond angles from ideal geometry.

\*\* Performed by Procheck.

**Supplementary Table 3** MurT residues contacting the substrates in docking models

| Substrate                             | Pose A            |               | Pose B            |                      |
|---------------------------------------|-------------------|---------------|-------------------|----------------------|
|                                       | Within 3.5 Å      | Within 4.0 Å  | Within 3.5 Å      | Within 4.0 Å         |
| Lipid II                              | Thr56 Lys59       | Id            | Lys59-Thr60-Leu61 | Id                   |
|                                       | Ser82 Gly83 Asn85 | PSGAN 81-85   | PSGANMI 81-87     | Id                   |
|                                       | Glu110            | Id            | Glu110 Asp112     | Id                   |
|                                       | Tyr426            | Id            | Tyr426            | Id                   |
| ATP Mg <sup>2+</sup> Mg <sup>2+</sup> | TNGKTL 56-61      | GTNGKTL 55-61 | TNGKTL 56-61      | GTNGKTL 55-61        |
|                                       | Glu110            | Id            | Glu110            |                      |
|                                       | Asp112-Glu113     | Id            | Asp112-Glu113     | Asp112-Glu113-Ala114 |
|                                       | Asn132 Phe134     | Id            | Asn132 Phe134     | Id                   |
|                                       |                   |               | Tyr219            | Id                   |
|                                       | Tyr269-Asn270     | Id            | Tyr269-Asn270     | Id                   |
|                                       | Tyr272-Asn273     | Id            | Tyr272-Asn273     | Id                   |
|                                       | Gln328            |               | Gln328            |                      |

Poses A and B correspond to the highest scoring docking models presented in Figs 6a and 6b, respectively. Id, identical to within 3.5 Å.



**Supplementary Table 4** *S. pneumoniae* strains used in this study

| Strain | Relevant characteristics                                                                                                                                         | Source    |
|--------|------------------------------------------------------------------------------------------------------------------------------------------------------------------|-----------|
| RH1    | R6 derivate but $\Delta comA::ermAM$ , $\Delta ebg::spc$ ; Ery <sup>r</sup> Spc <sup>r</sup>                                                                     | 3         |
| SPH131 | $\Delta comA::ermAM$ , P1::P <sub>comR</sub> ::comR, P <sub>comX</sub> ::Janus. Ery <sup>r</sup> , Kan <sup>r</sup>                                              | 4         |
| SPH476 | $\Delta comA::ermAM$ , P1::P <sub>comR</sub> ::comR, P <sub>comX</sub> -murT/gatD. Ery <sup>r</sup> , Sm <sup>r</sup>                                            | This work |
| SPH477 | $\Delta comA::ermAM$ , P1::P <sub>comR</sub> ::comR, P <sub>comX</sub> -murT/gatD, $\Delta murT_{wt}/gatD_{wt}$ ::Janus. Ery <sup>r</sup> , Kan <sup>r</sup>     | This work |
| SPH478 | $\Delta comA::ermAM$ , P1::P <sub>comR</sub> ::comR, P <sub>comX</sub> -murT/gatD, $\Delta murT_{wt}/gatD_{wt}$ ::DEL. Ery <sup>r</sup> , Sm <sup>r</sup>        | This work |
| SPH479 | $\Delta comA::ermAM$ , P1::P <sub>comR</sub> ::comR, P <sub>comX</sub> ::Janus, murT <sup>K59A</sup> . Ery <sup>r</sup> , Kan <sup>r</sup>                       | This work |
| SPH480 | $\Delta comA::ermAM$ , P1::P <sub>comR</sub> ::comR, P <sub>comX</sub> ::Janus, murT <sup>N85A</sup> . Ery <sup>r</sup> , Kan <sup>r</sup>                       | This work |
| SPH481 | $\Delta comA::ermAM$ , P1::P <sub>comR</sub> ::comR, P <sub>comX</sub> ::Janus, murT <sup>D112S, E113S</sup> . Ery <sup>r</sup> , Kan <sup>r</sup>               | This work |
| SPH482 | $\Delta comA::ermAM$ , P1::P <sub>comR</sub> ::comR, P <sub>comX</sub> ::Janus, murT <sup>C205S, C208S, C227S, C230S</sup> . Ery <sup>r</sup> , Kan <sup>r</sup> | This work |
| SPH483 | $\Delta comA::ermAM$ , P1::P <sub>comR</sub> ::comR, P <sub>comX</sub> ::Janus, murT <sup>D355A</sup> . Ery <sup>r</sup> , Kan <sup>r</sup>                      | This work |
| SPH484 | $\Delta comA::ermAM$ , P1::P <sub>comR</sub> ::comR, P <sub>comX</sub> ::Janus, gatD <sup>Y30A</sup> . Ery <sup>r</sup> , Kan <sup>r</sup>                       | This work |

**Supplementary Table 5** Primers used in this study

| Primer name                  | Sequence 5' → 3'                                              | Source    |
|------------------------------|---------------------------------------------------------------|-----------|
| C11-990 <i>murTK59Afw</i>    | TGTCACTGGAACAAATGGAGCAACCCTGA<br>CAACTGCCCTC                  | This work |
| C11-1012 <i>murTK59Arv</i>   | GAGGGCAGTTGTCAGGGTTGCTCCATTG<br>TTCCAGTGACA                   | This work |
| C12-983 <i>murTN85Afw</i>    | CCAACCCAAGCGGTGCCGCCATGATTACA<br>GGGATTG                      | This work |
| C12-1013 <i>murTN85Arv</i>   | CAATCCCTGTAATCATGGCGGCACCGCTT<br>GGGTTGG                      | This work |
| C13-993 <i>murTDESSfw</i>    | CAAAAAGTGGGAAAAATATTGCCGTCTC<br>GAAATTAGCTCAGCCAGTCTATCTCGTAT | This work |
| C13-1008 <i>murTDESSrv</i>   | ATACGAGATAGACTGGCTGAGCTAATTTT<br>GAGGACGGCAATATTTTTCCAGTTTTTG | This work |
| C14-987 <i>murTD136Afw</i>   | TACTAATATCTTCCGTGCCAGATGGACC<br>GTTTCG                        | This work |
| C14-1001 <i>murTD136Arv</i>  | CGAAACGGTCCATCTGGGCACGGAAGATA<br>TTAGTA                       | This work |
| C16-996 <i>murTD139Afw</i>   | TTCCGTGACCAGATGGCCCGTTTCGGTGA<br>AATC                         | This work |
| C16-1000 <i>murTD139Arv</i>  | GATTTACCGAAACGGGCCATCTGGTCAC<br>GGAA                          | This work |
| C17-985 <i>murTR140Afw</i>   | CTTCCGTGACCAGATGGACGCTTTCGGTG<br>AAATCTATACT                  | This work |
| C17-1002 <i>murTR140Arv</i>  | AGTATAGATTTACCGAAAGCGTCCATCT<br>GGTCACGGAAG                   | This work |
| C18-995 <i>murTE143Afw</i>   | CAGATGGACCGTTTCGGTGCAATCTATAC<br>TACCTATAAC                   | This work |
| C18-999 <i>murTE143Arv</i>   | GTTATAGGTAGTATAGATTGCACCGAAAC<br>GGTCCATCTG                   | This work |
| C19-992 <i>murT4C4Safw</i>   | CGAAGGGATTCTCAGTCCTGACAGCCAAG<br>GCATCCT                      | This work |
| C19-1005 <i>murT4C4Sarv</i>  | AGGATGCCTTGGCTGTCAGGACTGAGAAT<br>CCCTTCG                      | This work |
| C110-984 <i>murT4C4Sbfw</i>  | CTTGGGTGCCTATATCAGTGAAGGTAGTG<br>GATGTAAACGTCC                | This work |
| C110-1006 <i>murT4C4Sbrv</i> | GGACGTTTACATCCACTACCTTCACTGATA<br>TAGGCACCCAAG                | This work |
| C111-988 <i>murTD355Afw</i>  | CTATGCAGATGGAATTGCCACTAGCTGGA<br>TCTGGG                       | This work |
| C111-1009 <i>murTD355Arv</i> | CCCAGATCCAGCTAGTGGCAATTCCATCT<br>GCATAG                       | This work |
| C116-994 <i>gatDY30Afw</i>   | CGGAAATCTCATGAATACCGCCGGGGACA<br>ATGGAAACATC                  | This work |
| C116-1003 <i>gatDY30Arv</i>  | GATGTTTCCATTGTCCCCGGCGGTATTCAT<br>GAGATTTCCG                  | This work |
| Kan484.F                     | GTTTGATTTTTAATGGATAATGTG                                      | 3         |
| RpsL41.R                     | CTTTCCTTATGCTTTTGGAC                                          | 3         |
| khb31                        | ATAACAAATCCAGTAGCTTTGG                                        | 4         |
| khb33                        | TTTCTAATATGTAACCTTCCCAAT                                      | 4         |
| khb34                        | CATCGGAACCTATACTCTTTTAG                                       | 4         |
| khb36                        | TGAACCTCCAATAATAAATAAAT                                       | 4         |
| ds188                        | ATTTATATTTATTATTGGAGGTTCA<br>ATGAACTTAAAACTACTTTGGG           | This work |
| ds189                        | ATTGGGAAGAGTTACATATTAGAAATTAA<br>GAAAAGTCAGCCTTGCTT           | This work |
| ds190                        | GTCTTTGACTCAACAGGTATC                                         | This work |

|                                                  |                                                                                                  |           |
|--------------------------------------------------|--------------------------------------------------------------------------------------------------|-----------|
| ds191                                            | CACATTATCCATTAAAAATCAAACGTTTCT<br>ATTATATCACAAAAGAG                                              | This work |
| ds192                                            | TTAAATGTGCTATAATACTAGAAAATACT<br>TACAAAGGAAAATGATATCAAAGAAC                                      | This work |
| ds193                                            | GTCCACTTCATGAGCAGTCAC                                                                            | This work |
| ds194                                            | CCTCTTTTGTGATATAATAGAAACACAAA<br>GGAAAATGATATCAAAGAAC                                            | This work |
| ds195                                            | GTTTCTATTATATCACAAAAGAGG                                                                         | This work |
| ds441 fwd <i>murT</i> K59A                       | <u>GCA</u> ACCCTGACA <u>ACTGCCCTCAC</u>                                                          | This work |
| ds442 rev <i>murT</i> K59A                       | GTGAGGGCAGTTGTCAGGGTT <u>GCTCCATT</u><br>TGTTCCAGTGACAACG                                        | This work |
| ds443 fwd <i>murT</i> N85A                       | <u>GCCATGATTACAGGGATTGCAACAAC</u>                                                                | This work |
| ds444 rev <i>murT</i> N85A                       | GTTGTTGCAATCCCTGTAATCAT <u>GGCGGC</u><br>ACCGCTGGGTTGGTTAG                                       | This work |
| ds445 fwd <i>murT</i><br>D112S,E113S             | <u>AGTAGTGCCAGTCTATCTCGTATCTG</u>                                                                | This work |
| ds446 rev <i>murT</i><br>D112S,E113S             | CAGATACGAGATAGACTGGC <u>ACTACTAAT</u><br>TTCGAGGACGGCAATATTTTTC                                  | This work |
| ds447 fwd <i>murT</i><br>C205S,C208S,C227S,C230S | TATGAGCATAATACCTATGCAA <u>ACTTGGG</u><br>TGCCTATATC <u>AGTGAAGGTAGTGGATGTA</u><br>AACGTCCTGATCTC | This work |
| ds448 rev <i>murT</i><br>C205S,C208S,C227S,C230S | GTTTGCATAGGTATTATGCTCATATTTGAG<br>GATGCCTTG <u>ACTGTCAGGACTGAGAATCC</u><br>CTTCGGTATTGTAG        | This work |
| ds449 fwd <i>murT</i> D355A                      | <u>GCA</u> ACTAGCTGGATCTGGGATGC                                                                  | This work |
| ds450 rev <i>murT</i> D355A                      | GCATCCCAGATCCAGCTAGTT <u>IGCAATCC</u><br>ATCTGCATAGTTGGC                                         | This work |
| ds451 fwd <i>gatD</i> Y30A                       | <u>GC</u> AGGGGACAATGGAAACATCCTC                                                                 | This work |
| ds452 rev <i>gatD</i> Y30A                       | GAGGATGTTTCCATTGTCC <u>CCIGCGGTATT</u><br>CATGAGATTTCCGTAG                                       | This work |

---

## Supplementary References

1. Pei, J., Kim, B.-H. & Grishin, N. V. PROMALS3D: a tool for multiple protein sequence and structure alignments. *Nucleic Acids Res.* **36**, 2295–2300 (2008).
2. Bui, N. K. *et al.* Isolation and analysis of cell wall components from *Streptococcus pneumoniae*. *Anal. Biochem.* **421**, 657–666 (2012).
3. Johnsborg, O., Eldholm, V., Bjørnstad, M. L. & Håvarstein, L. S. A predatory mechanism dramatically increases the efficiency of lateral gene transfer in *Streptococcus pneumoniae* and related commensal species. *Mol. Microbiol.* **69**, 245–253 (2008).
4. Berg, K. H., Bjørnstad, T. J., Straume, D. & Håvarstein, L. S. Peptide-regulated gene depletion system developed for use in *Streptococcus pneumoniae*. *J. Bacteriol.* **193**, 5207–5215 (2011).
